# Supplementary material
Source: PubMed Central journal article supplement (PMC4352786)
Supplement: pnas.201424641SI.pdf [file pnas.201424641SI.pdf]

# Supporting Information

Tsai et al. 10.1073/pnas.1424641112

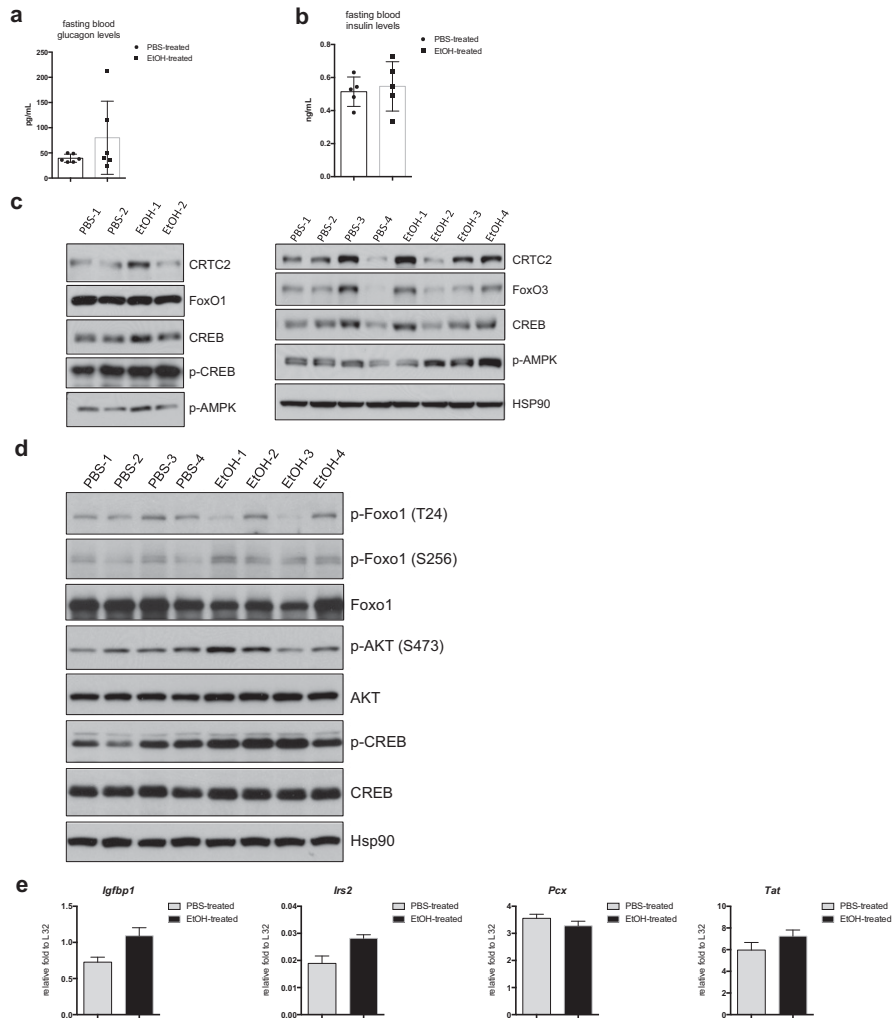

**Fig. S1.** Effects of ethanol in vivo. (A) Fasting blood glucagon concentrations in WT mice treated with PBS or ethanol (EtOH). (B) Fasting blood insulin concentrations in WT mice treated with PBS or ethanol. (C) Western blot showing effects of ethanol on protein expression in livers of fasted WT mice treated with PBS or ethanol. The left and right panels represent two independent cohort experiments. (D) Western blot showing the effects of ethanol on amounts of phosphorylated Foxo1, AKT, and CREB in livers of fasted WT mice treated with PBS or ethanol. HSP90 served as a loading control. (E) Analysis of mRNA amounts for *Igfbp1*, *Irs2*, *Pcx*, and *Tat* genes in livers of fasted WT mice treated with PBS or ethanol. Each bar represents averaged results,  $n = 5$ . Error bars indicate SEM.

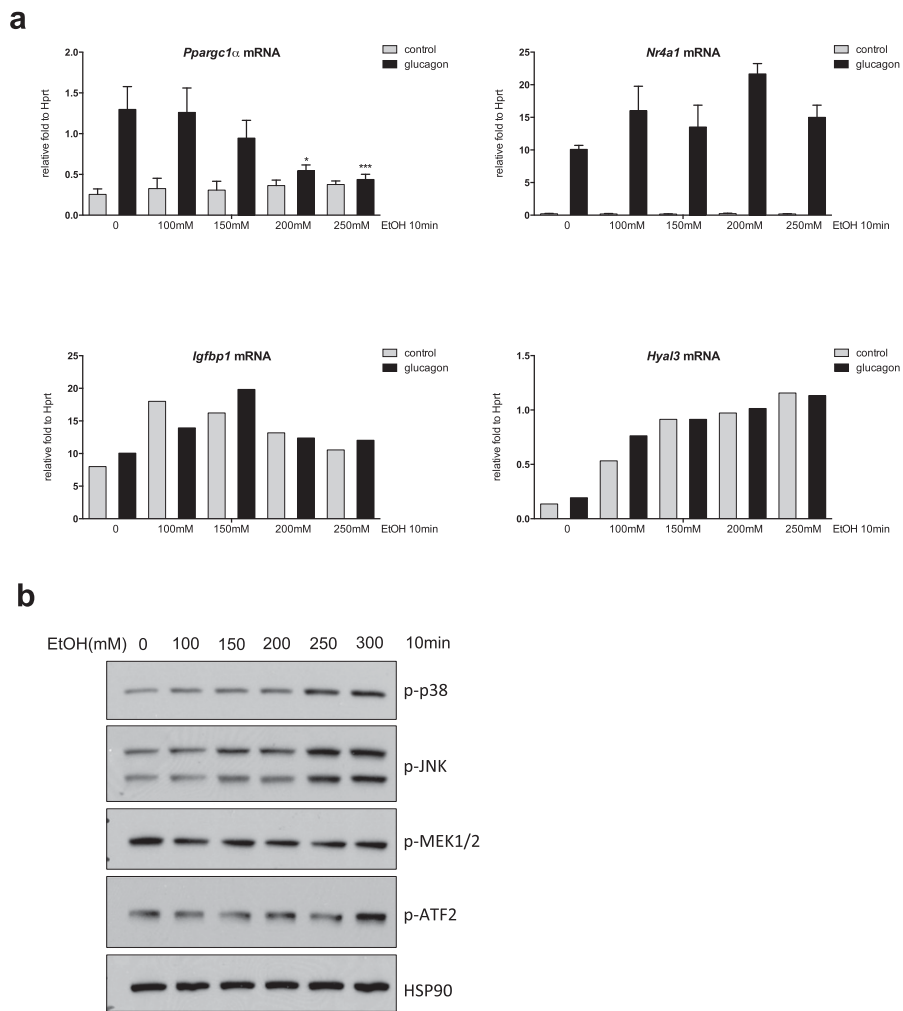

**Fig. S2.** Effects of ethanol in primary hepatocytes. (A) Effects of a 10-min pretreatment with ethanol (EtOH) on mRNA amounts for *Pgc1a*, *Nr4a1*, *Igfbp1*, and *Hya13* in mouse primary hepatocytes exposed to glucagon for 1.5 h. Each bar represents averaged results for three biological replicates, assayed three times each. Error bars indicate SEM. \* $P < 0.05$ ; \*\* $P < 0.01$ ; \*\*\* $P < 0.001$ . (B) Western blot showing the effects of a 10-min treatment with ethanol on phosphorylation of p38 and JNK kinases in primary hepatocytes. HSP90 served as a loading control.

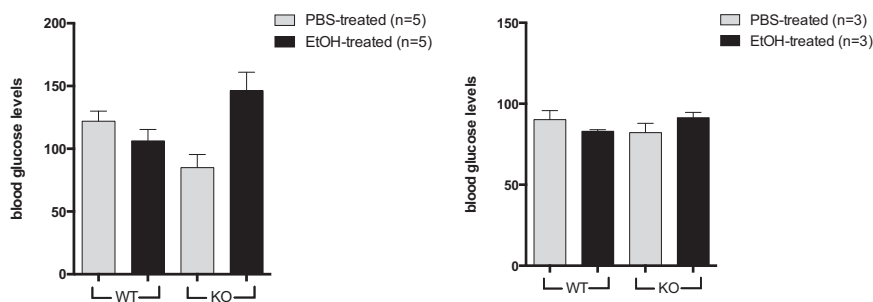

**Fig. S3.** Effects of ethanol in *ATF3<sup>-/-</sup>* mice. Shown are fasting blood glucose concentrations in control WT and *ATF3<sup>-/-</sup>* mice treated with PBS or ethanol (EtOH). (Left) Cohort 1. Mean BAL was  $406 \pm 14$  mg/dL in WT mice and  $371 \pm 18$  mg/dL in *ATF3<sup>-/-</sup>* mice. Each bar represents averaged results,  $n = 5$ . Error bars indicate SEM. (Right) Cohort 2. Mean BAL was  $450 \pm 15$  mg/dL in WT mice and  $447 \pm 6$  mg/dL in *ATF3<sup>-/-</sup>* mice. Each bar represents averaged results,  $n = 3$ . Error bars indicate SEM.
